# Supplementary material for: Integrating quantitative and qualitative data and findings when undertaking randomised controlled trials
Source: PubMed Central journal article supplement (PMC6886933; doi:10.1136/bmjopen-2019-032081), 2019-11-26
Supplement: bmjopen-2019-032081.draft_revisions.pdf [file bmjopen-2019-032081.draft_revisions.pdf]

# BMJ Open

BMJ Open is committed to open peer review. As part of this commitment we make the peer review history of every article we publish publicly available.

When an article is published we post the peer reviewers' comments and the authors' responses online. We also post the versions of the paper that were used during peer review. These are the versions that the peer review comments apply to.

The versions of the paper that follow are the versions that were submitted during the peer review process. They are not the versions of record or the final published versions. They should not be cited or distributed as the published version of this manuscript.

BMJ Open is an open access journal and the full, final, typeset and author-corrected version of record of the manuscript is available on our site with no access controls, subscription charges or pay-per-view fees (<http://bmjopen.bmj.com>).

If you have any questions on BMJ Open's open peer review process please email [info.bmjopen@bmj.com](mailto:info.bmjopen@bmj.com)

# BMJ Open

## Integrating quantitative and qualitative data and findings when undertaking randomised controlled trials

|                                    |                                                                                                                                                                                                                                                                                                                                                                                                                                                                                                                                                                                                                                                                                                                                                                                                                                                                                                                                                                                                                                                                                                                                                                                                                                                                                                                                                                                                                                                                                                                                                                                                               |
|------------------------------------|---------------------------------------------------------------------------------------------------------------------------------------------------------------------------------------------------------------------------------------------------------------------------------------------------------------------------------------------------------------------------------------------------------------------------------------------------------------------------------------------------------------------------------------------------------------------------------------------------------------------------------------------------------------------------------------------------------------------------------------------------------------------------------------------------------------------------------------------------------------------------------------------------------------------------------------------------------------------------------------------------------------------------------------------------------------------------------------------------------------------------------------------------------------------------------------------------------------------------------------------------------------------------------------------------------------------------------------------------------------------------------------------------------------------------------------------------------------------------------------------------------------------------------------------------------------------------------------------------------------|
| Journal:                           | <i>BMJ Open</i>                                                                                                                                                                                                                                                                                                                                                                                                                                                                                                                                                                                                                                                                                                                                                                                                                                                                                                                                                                                                                                                                                                                                                                                                                                                                                                                                                                                                                                                                                                                                                                                               |
| Manuscript ID                      | bmjopen-2019-032081.R1                                                                                                                                                                                                                                                                                                                                                                                                                                                                                                                                                                                                                                                                                                                                                                                                                                                                                                                                                                                                                                                                                                                                                                                                                                                                                                                                                                                                                                                                                                                                                                                        |
| Article Type:                      | Communication                                                                                                                                                                                                                                                                                                                                                                                                                                                                                                                                                                                                                                                                                                                                                                                                                                                                                                                                                                                                                                                                                                                                                                                                                                                                                                                                                                                                                                                                                                                                                                                                 |
| Date Submitted by the Author:      | 08-Jul-2019                                                                                                                                                                                                                                                                                                                                                                                                                                                                                                                                                                                                                                                                                                                                                                                                                                                                                                                                                                                                                                                                                                                                                                                                                                                                                                                                                                                                                                                                                                                                                                                                   |
| Complete List of Authors:          | Hill, Jacqueline; University of Exeter, College of Medicine and Health<br>Richards, David; University of Exeter, College of Medicine and Health<br>Bazeley, Patricia; Research Support P/L<br>Borglin, Gunilla; Malmö University, Department of Care Science<br>Craig , Peter ; Glasgow University<br>Emsley, Richard; King's College London, Department of Biostatistics and<br>Health Informatics, Institute of Psychiatry, Psychology and Neuroscience<br>Frost, Julia; University of Exeter, College of Medicine and Health<br>Horwood, Jeremy; University of Bristol, UK, Population Health Sciences<br>Hutchings, Hayley; Swansea University, Medicine<br>Jinks, Clare; Keele University, Arthritis Research UK Primary Care Centre<br>Montgomery, Alan; University of Nottingham,<br>Moore, Graham; Cardiff University, School of Social Sciences<br>Plano Clark, Vicki; University of Cincinnati College of Education Criminal<br>Justice and Human Services, School of Education<br>Tonkin-Crine, Sarah ; University of Oxford, Nuffield Department of<br>Primary Care Health Sciences, and NIHR Health Protection Research Unit<br>in Healthcare Associated Infections and Antimicrobial Resistance<br>Wade, Julia; University of Bristol, Population Health Sciences<br>Warren, Fiona; University of Exeter, College of Medicine and Health<br>Wyke, Sally; University of Glasgow, Intitute of Health and Wellbeing<br>Young, Bridget; University of Liverpool, Institute of Population Health<br>Sciences<br>O'Cathain, Alicia; University of Sheffield, School of Health and Related<br>Research |
| <b>Primary Subject<br>Heading</b>: | Research methods                                                                                                                                                                                                                                                                                                                                                                                                                                                                                                                                                                                                                                                                                                                                                                                                                                                                                                                                                                                                                                                                                                                                                                                                                                                                                                                                                                                                                                                                                                                                                                                              |
| Secondary Subject Heading:         | Health services research, Evidence based practice, Patient-centred<br>medicine, Qualitative research                                                                                                                                                                                                                                                                                                                                                                                                                                                                                                                                                                                                                                                                                                                                                                                                                                                                                                                                                                                                                                                                                                                                                                                                                                                                                                                                                                                                                                                                                                          |
| Keywords:                          | QUALITATIVE RESEARCH, STATISTICS & RESEARCH METHODS, Quality<br>in health care < HEALTH SERVICES ADMINISTRATION & MANAGEMENT                                                                                                                                                                                                                                                                                                                                                                                                                                                                                                                                                                                                                                                                                                                                                                                                                                                                                                                                                                                                                                                                                                                                                                                                                                                                                                                                                                                                                                                                                  |
|                                    |                                                                                                                                                                                                                                                                                                                                                                                                                                                                                                                                                                                                                                                                                                                                                                                                                                                                                                                                                                                                                                                                                                                                                                                                                                                                                                                                                                                                                                                                                                                                                                                                               |

1  
2  
3  
4  
5  
6  
7  
8  
9  
10  
11  
12  
13  
14  
15  
16  
17  
18  
19  
20  
21  
22  
23  
24  
25  
26  
27  
28  
29  
30  
31  
32  
33  
34  
35  
36  
37  
38  
39  
40  
41  
42  
43  
44  
45  
46  
47  
48  
49  
50  
51  
52  
53  
54  
55  
56  
57  
58  
59  
60

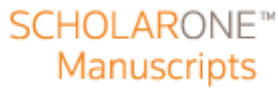

## **Integrating quantitative and qualitative data and findings when undertaking randomised**

### **controlled trials**

Jacqueline J. Hill, Institute for Health Research, College of Medicine and Health, University of Exeter, Exeter, UK.

\*David A Richards, Institute for Health Research, College of Medicine and Health, University of Exeter, Exeter, UK. [d.a.richards@exeter.ac.uk](mailto:d.a.richards@exeter.ac.uk); 01392 724615

Patricia Bazeley, Research Support, Western Sydney University, Sydney, Australia.

Gunilla Borglin, Department of Care Science, Malmo University, Sweden.

Peter Craig, MRC/CSO Social and Public Health Sciences Unit, University of Glasgow, UK.

Richard Emsley, Department of Biostatistics and Health Informatics, Institute of Psychiatry, Psychology and Neuroscience, King's College London, London, UK.

Julia Frost, Institute for Health Research, College of Medicine and Health, University of Exeter, Exeter, UK.

Jeremy Horwood, Population Health Sciences, University of Bristol, Bristol, UK.

Hayley Hutchings, College of Medicine, Swansea University, Swansea, UK.

Clare Jinks, Arthritis Research UK Primary Care Centre, Keele University, Staffordshire, UK.

Alan Montgomery, Nottingham Clinical Trials Unit, University of Nottingham, Nottingham, UK.

Graham Moore, School of Social Sciences, Cardiff University, Cardiff, UK.

Vicki Plano Clark, School of Education, University of Cincinnati College of Education Criminal Justice and Human Services, Cincinnati, US.

Sarah Tonkin-Crine, Department of Primary Care Health Sciences, and NIHR Health Protection Research Unit in Healthcare Associated Infections and Antimicrobial Resistance, University of Oxford, Oxford, UK.

Julia Wade, Population Health Sciences, University of Bristol, Bristol, UK.

Fiona Warren, Institute for Health Research, College of Medicine and Health, University of Exeter, Exeter, UK.

Sally Wyke, Institute of Health and Wellbeing, University of Glasgow, Glasgow, UK.

Bridget Young, Institute of Population Health Sciences, University of Liverpool, Liverpool, UK.

Alicia O'Cathain, Medical Care Research Unit, SchARR, University of Sheffield, Sheffield, UK.

1  
2  
3  
4  
5  
6  
7  
8  
9  
10  
11  
12  
13  
14  
15  
16  
17  
18  
19  
20  
21  
22  
23  
24  
25  
26  
27  
28  
29  
30  
31  
32  
33  
34  
35  
36  
37  
38  
39  
40  
41  
42  
43  
44  
45  
46  
47  
48  
49  
50  
51  
52  
53  
54  
55  
56  
57  
58  
59  
60

\* Corresponding author

Keywords: research methods; integration; qualitative; trials; quantitative

Word count: 2605

For peer review only

**ABSTRACT**

It is common to undertake qualitative research alongside randomised controlled trials (RCTs) when evaluating complex interventions. Researchers tend to analyse these datasets separately and then informally integrate their findings within the discussion section of the final report, rarely integrating quantitative and qualitative data or findings, and missing opportunities to integrate data in order to generate further important insights about the intervention under evaluation.

This paper reports on a two day expert meeting funded by the United Kingdom Medical Research Council Hubs for Trials Methodology Research with the aim to reflect on the current level of integration occurring in the context of RCTs, the potential value of integration, and the need for guidance to help researchers plan and undertake integration specific to this context. We summarise integration techniques and highlight the potential value of integration using three examples. We suggest that applying mixed methods integration techniques to data or findings from studies involving both RCTs and qualitative research can yield insights that might be useful for understanding variation in outcomes, the mechanism by which interventions have an impact, and identifying ways of tailoring therapy to patient preference and type. Given a general lack of examples and knowledge of these techniques, researchers and funders will need future guidance on how to undertake and appraise them.

## BACKGROUND

It is common to undertake qualitative research alongside randomised controlled trials (RCTs) when evaluating complex interventions.[1,2] Qualitative research can be used to explore the feasibility, acceptability and implementation of an intervention to help understand how it was effective or why it was not effective within the RCT, or to explore the conduct of the RCT to help improve recruitment or retention rates.[2] Qualitative research can be undertaken as part of a mixed methods process evaluation,[3] as a qualitative process evaluation, or as an embedded qualitative study alongside a fully powered or pilot RCT.[4] In studies like this, researchers have a number of datasets to analyse: outcome data from the RCT, quantitative process data, and qualitative process data. Researchers tend to analyse these datasets separately and then informally integrate their findings within the discussion section of the final report to funders. Researchers rarely integrate quantitative and qualitative data or findings,[1] or use formal analytical techniques recommended within wider mixed methods research. This may be because researchers are not aware of existing integration techniques or do not see the value of these techniques to the context of RCTs. They may be missing opportunities to use data that has taken years to collect at great cost in order to generate further important insights about the intervention under evaluation.

## INTEGRATING DATA FROM MIXED METHODS DESIGNS

In 2017, researchers who generate evidence on the effectiveness of health interventions in health care and public health, and researchers who have written methodological guidance on integration in mixed methods research, came together in a two day meeting funded by the Medical Research Council Hubs for Trials Methodology Research. The aim was to reflect on the current level of integration occurring in the context of RCTs, the potential value of integration, and the need for guidance to help researchers plan and undertake integration specific to this context. In this paper, the attendees at that meeting summarise relevant integration techniques, describe the key conclusions drawn, and propose the potential value of integration using three examples of

1  
2  
3 integration in the context of both pilot and fully powered RCTs. The focus is on RCTs of health  
4 interventions but the paper is likely to be relevant to RCTs in other fields such as education and  
5 social care.  
6  
7  
8  
9

### 10 11 12 **Summary of integration techniques**

13  
14 The term integration is used to describe an intentional process whereby researchers use quantitative  
15 and qualitative data or findings interdependently to address a common goal. Mixed methods  
16 researchers have described a range of integration techniques. [5-9] A key integration technique is  
17 joint displays that involve the production of a figure, table or graph to bring together and compare  
18 quantitative and qualitative data or findings.  
19  
20  
21  
22  
23  
24  
25  
26  
27

### 28 **Meeting conclusions: the need for examples and guidance**

29  
30 Having listened to discussions about integration in mixed methods research, and considered its role  
31 in the context of RCTs, attendees concluded that integration rarely occurs in practice, that there is  
32 much to be learnt from integration techniques from wider mixed methods research, and that an  
33 important step is to communicate the potential value of integration to the research community  
34 through relevant examples. Once researchers see evidence of value, in terms of this practice  
35 generating credible new and useful insights, formal guidance could be developed to ensure the  
36 quality of this endeavour. This guidance could address how researchers could make decisions about  
37 the most appropriate approach to adopt in different circumstances, how to ensure that the potential  
38 for data integration is factored into trial design at the earliest possible stages, the meaning of  
39 credibility for integrative practices, and how reviewers, funding boards, and readers can make  
40 judgments about the credibility of integration.  
41  
42  
43  
44  
45  
46  
47  
48  
49  
50  
51  
52  
53  
54  
55  
56  
57  
58  
59  
60



## Examples of the potential value of integration in the context of RCTs

Attendees struggled to identify many published examples of integration undertaken in the context of RCTs. Three examples are described below, integrating data or findings in the context of pilot or fully powered RCTs.

### Example 1: Integrating findings from a pilot RCT and embedded qualitative interview study to develop insights about treatment responses

Thirty-one cancer patients took part in a cross-over pilot RCT of music medicine compared with music therapy.[10] Music medicine consisted of two sessions of listening to pre-recorded music; music therapy involved two sessions of interactive music-making with a music therapist. Before and after each session patients rated their mood, anxiety, relaxation and pain. Thirty RCT participants also completed a qualitative interview at the end of treatment. The quantitative rates of change in outcomes over time and qualitative interview data of experiences were analysed separately. Findings were then integrated to explore why some individual patients appeared to benefit more from one intervention than the other. The pilot RCT was not designed to detect clinically meaningful differences in the effectiveness of these treatments so did not provide robust evidence on the relative effects of these treatments. The findings from the pilot RCT were that patients' mood, anxiety, relaxation and pain appeared to improve following either music medicine or music therapy. The findings from the qualitative interviews were that patients experienced music medicine and music therapy as relaxing and fun. Participants escaped from stress in general and worries related to cancer in particular. Music also offered hope for the future. In addition, music therapy enabled patients to be creative and the presence of a therapist helped some patients to release emotion. Other patients felt more comfortable with music medicine because there was no therapist and because they could listen to familiar music.

1  
2  
3 Findings were integrated during the analysis phase of the study to explore reasons for variation in  
4 outcomes. The researchers did this by creating a joint display of quantitative and qualitative findings  
5 for four groups of the 30 patients with both qualitative and quantitative data: participants who  
6 showed quantitative (a) improvement following music therapy (MT) but much less or no  
7 improvement following music medicine (MM) (b) improvement following MM but much less or no  
8 improvement following MT, (c) improvement following both interventions, and (d) deterioration  
9 following both interventions. Improvement or deterioration was determined based on z-scores for  
10 changes in mood, anxiety, relaxation and pain for each patient. Patient experiences, expressed in the  
11 qualitative interviews, were summarised in the table for each of the four groups. These experiences  
12 differed by each of the four groups. Patients who described valuing the therapeutic relationship and  
13 creative elements of making music in the qualitative research benefited more from MT than MM.  
14 Patients who were apprehensive about active music making and exploring feelings related to cancer  
15 benefited more from MM than MT (see Figure 1).  
16  
17  
18  
19  
20  
21  
22  
23  
24  
25  
26  
27  
28  
29  
30  
31  
32  
33  
34  
35  
36  
37  
38

---insert figure 1 somewhere near here---

39 Integration of findings from independent quantitative and qualitative analyses identified that  
40 participant preferences and attitudes appeared to impact on treatment benefits. This generates the  
41 hypothesis that an effective intervention could be one where cancer patients are offered a choice of  
42 music therapy or music medicine based on their preferences. This hypothesis could then be tested  
43 in a fully powered RCT. This approach to analysis is not without problems. For example, blinding of  
44 qualitative researchers to the groups would be important during integration, and such analyses  
45 always involve small numbers. Nonetheless it shows the potential for this technique to identify new  
46 insights about variation in outcomes and how to develop interventions to address them.  
47  
48  
49  
50  
51  
52  
53  
54  
55  
56  
57  
58  
59  
60

1  
2  
3 **Example 2: Integrating data from a pilot RCT and qualitative process data to develop insights**  
4  
5 **about treatment adherence and outcomes**  
6

7  
8 Sixty-eight adults with depression participated in a pilot RCT of Morita Therapy plus treatment as  
9  
10 usual (TAU) versus TAU alone.[11] Morita Therapy is a Japanese psychological therapy for common  
11  
12 mental health problems where patients are taught that unpleasant thoughts and emotions ebb and  
13  
14 flow as a matter of course, cannot be controlled by will, and can be accepted as part of the natural  
15  
16 ecology of the human experience. Twenty-eight intervention participants also attended a post-  
17  
18 treatment qualitative interview.[12] Following separate analysis of the RCT data and the qualitative  
19  
20 interviews, data from the pilot RCT and interviews were integrated at the level of the individual  
21  
22 participant to explore how participants' views of the intervention related to the number of sessions  
23  
24 they attended and whether they responded to treatment. Morita Therapy participants attended a  
25  
26 mean of 8 treatment sessions out of a maximum of 12; 24/34 (70.6%) adhered to a per-protocol  
27  
28 minimum dose ( $\geq 5$  sessions). The pilot RCT was not powered to detect clinically meaningful  
29  
30 differences in treatment effectiveness; however, at follow-up 22/33 intervention participants  
31  
32 (66.7%) scored below the threshold for major depressive disorder on a depression symptom  
33  
34 checklist compared with 13.3% of controls. During the qualitative interviews, many but not all of  
35  
36 those receiving Morita Therapy found it acceptable. Acceptability was related to participants'  
37  
38 expectations and understandings of treatment (or 'orientation' towards treatment) being  
39  
40 compatible or not with the principles of Morita Therapy. Participants distinguished between  
41  
42 engaging with Morita Therapy on a conceptual level and engaging with it on a practical level such as  
43  
44 finding the required time to do it.  
45  
46  
47  
48  
49  
50

51  
52 Quantitative and qualitative data were then integrated for individual intervention participants.  
53  
54 Qualitative data were organised into typologies of views on Morita Therapy, according to the extent  
55  
56 to which participants found (1) the principles and (2) the practical processes of the therapy  
57  
58 acceptable. Quantitative data from the RCT on the numbers of sessions attended and the clinical  
59  
60

1  
2  
3 outcomes were added into a joint display. Participants who identified with Morita Therapy  
4 principles typically responded to treatment regardless of the number of sessions they attended;  
5  
6 conversely, those whose orientation towards treatment was incompatible with the intervention did  
7  
8 not respond to treatment, again regardless of treatment adherence. Participants whose personal  
9  
10 circumstances (such as a lack of time or support from others) impeded their opportunity to engage  
11  
12 in the intervention generally attended the fewest number of sessions but this did not drive clinical  
13  
14  
15  
16  
17 outcome.

18  
19  
20  
21 By integrating qualitative and quantitative data the possibility of new relationships between  
22  
23 orientation towards treatment, adherence and clinical outcomes were found. These suggested that  
24  
25 personalising depression treatment by choosing an approach (for example, “Western” or “Eastern”  
26  
27 treatment, directive or non-directive approaches) according to the extent to which the conceptual  
28  
29 underpinnings of that treatment were compatible with a person’s own worldview, could lead to  
30  
31 better individual outcomes. It also raised the possibility that, where this congruence is present,  
32  
33 patients with demanding personal circumstances which constrain their ability to engage in  
34  
35 treatment may still benefit from a lower intensity version of the same treatment offered in fewer  
36  
37 sessions. The analysis did not prove that these insights were true but raised interesting possibilities  
38  
39 for testing in future RCTs of personalised medicine.  
40  
41  
42  
43  
44  
45

46 **Example 3: Integrating findings from the quantitative and qualitative parts of a process evaluation**  
47  
48 **to interpret the findings of a fully powered cluster RCT**

49  
50 A large, multi-country factorial cluster RCT was conducted to examine the effectiveness of  
51  
52 interventions aimed at decreasing antibiotic prescribing for acute cough by general practitioners  
53  
54 (GPs).[13] Interventions were: (1) GP communication skills training and use of a patient booklet; (2)  
55  
56 training in the provision and use of a C-reactive protein (CRP) test device; (3) both interventions; or  
57  
58 (4) neither interventions. Each of the separate interventions led to decreases in antibiotic  
59  
60

1  
2  
3 prescribing and the combination of both led to the largest decrease. The mixed methods process  
4 evaluation, undertaken alongside the RCT, collected quantitative and qualitative data on patients'  
5 and GPs' views on prescribing antibiotics for acute cough and their experiences of the interventions.  
6  
7 Quantitative self-report data were collected from 2886 patients and 346 GPs. Qualitative data were  
8 collected from interviews with 62 patients and 66 GPs. Data from the four different sources in the  
9 process evaluation were analysed separately. Findings from all four sources were then compared in  
10 an integrative analysis.[14] Based on the surveys, there was a high level of satisfaction with both  
11 interventions. GPs reported that the communication skills training, use of a patient booklet, and  
12 training with use of the CRP test helped them to reduce prescribing. Patients who received the  
13 booklet reported the highest levels of self-care enablement for their cough and awareness that  
14 taking antibiotics could be risky and harmful. Based on the qualitative interviews, GPs felt that the  
15 communication skills training gave them greater confidence in addressing patient expectations for  
16 an antibiotic and that the CRP test was helpful to decrease diagnostic uncertainty and reassure  
17 patients. The booklet and use of the CRP test were acceptable to patients and patients perceived  
18 that both the interventions supported GPs' prescribing decision.

19  
20  
21  
22  
23  
24  
25  
26  
27  
28  
29  
30  
31  
32  
33  
34  
35  
36  
37  
38  
39 The key findings from each of the four datasets in the process evaluation were integrated by  
40 summarising them in a form of joint display known as Triangulation Protocol.[15] Three analysts  
41 independently compared findings across the datasets, considering where they agreed, partly agreed,  
42 did not agree, or where there was an unexpected gap in findings from one of the datasets. Examples  
43 of the joint displays are given within the article. There was disagreement between findings from  
44 different datasets in terms of the utility of the CRP test. In the qualitative interviews with GPs, the  
45 CRP test was viewed as helping to convince patients that a no-antibiotic decision was appropriate  
46 when the patient expected an antibiotic to be prescribed. In contrast, patients reported in  
47 interviews that they were confident in the GP's prescription decision regardless of whether or not  
48 the CRP test had been undertaken, especially if they were given a detailed explanation by their GP  
49  
50  
51  
52  
53  
54  
55  
56  
57  
58  
59  
60

1  
2  
3 and a booklet on self-care. Findings from the patient survey reinforced the importance of  
4  
5 communication to patients. This highlighted the importance to patients of improved communication  
6  
7 rather than diagnostics for antibiotic prescribing. This study also highlighted that attention needs to  
8  
9 be paid to the quality of the application of integration techniques, for example the use of three  
10  
11 independent analysts to create and interpret the joint display.  
12  
13  
14  
15

## 16 **CONCLUSIONS**

17  
18 Applying mixed methods integration techniques to data or findings from studies involving both RCTs  
19  
20 and qualitative research can yield insights that might be useful for understanding variation in  
21  
22 outcomes, the mechanism by which interventions have an impact, and identifying ways of tailoring  
23  
24 therapy to patient preference and type. Further examples of integration might help to persuade  
25  
26 researchers and funders of the value of doing this. If future examples show value then guidance can  
27  
28 help to ensure the quality of this practice by recommending the use of independent analysts, and  
29  
30 blinding of analysts, for example. Guidance might also equip research funding boards, reviewers and  
31  
32 other readers to judge the credibility of any integration.  
33  
34  
35  
36  
37  
38

39 **Competing interests:** the authors declare that they have no competing interests

40  
41 **Funding:** the United Kingdom Medical Research Council Hubs for Trials Methodology Research  
42  
43 (HTMR) Network funded the meeting. The funder had no role in the design of the meeting and in  
44  
45 writing the manuscript.  
46  
47

48 **Acknowledgements and authors' contributions:** JJH, AoC and DAR conceived, planned and  
49  
50 conducted the meeting. JJH, AoC and DAR drafted the original manuscript. PB, GB, PC, RE, JF, JH, HH,  
51  
52 CJ, AM, GM, VPC, ST-C, JW, FW, SW, BY attended the meeting and read, edited and approved the  
53  
54 final manuscript. Holly Sugg provided information for example 2.  
55  
56  
57  
58  
59  
60

## REFERENCES

- 1 Lewin S, Glenton C, and Oxman AD, *Use of qualitative methods alongside randomised controlled trials of complex healthcare interventions: methodological study*. BMJ 2009;**339**:b3496.
- 2 O'Cathain A, Thomas KJ, Drabble SJ et al., *What can qualitative research do for randomised controlled trials? A systematic mapping review*. BMJ Open 2013;**3**(6):e002889.
- 3 Moore G, Audrey S, Barker M et al., *Process evaluation of complex interventions: Medical Research Council guidance*. BMJ 2015;**350**.
- 4 O'Cathain A, *A practical guide to using qualitative research with randomized controlled trials*; Oxford: OUP, 2018.
- 5 Bazeley P, *Integrating analyses in mixed methods research*; London: Sage, 2018.
- 6 Feters MD, Curry LA, and Creswell JW, *Achieving Integration in Mixed Methods Designs- Principles and Practices*. Health Services Research 2013;**48**(6):2134-2156.
- 7 Creswell JW and Plano Clark VL, *Designing and conducting mixed methods research*. 3rd ed. Thousand Oaks, CA; London, UK; New Dehli, India; Singapore: SAGE, 2017.
- 8 O'Cathain A, Murphy E, and Nicholl J, *Three techniques for integrating data in mixed methods studies*. BMJ 2010;**341**.

- 1  
2  
3 9 Guetterman TC, Fetters MD, and Creswell JW, *Integrating Quantitative and Qualitative*  
4 *Results in Health Science Mixed Methods Research Through Joint Displays*. Ann Fam Med  
5  
6  
7 2015;**13**(6):554-561.  
8  
9  
10  
11  
12 10 Bradt J, Potvin N, Kesslick A et al., *The impact of music therapy versus music medicine on*  
13 *psychological outcomes and pain in cancer patients: a mixed methods study*. Support Care  
14  
15  
16 Cancer 2015;**23**(5):1261-1271.  
17  
18  
19  
20  
21 11. Sugg HVR, Richards DA and Frost J, *Morita Therapy for depression (Morita Trial): a pilot*  
22 *randomised controlled trial*. BMJ Open 2018;8:e021605.doi:10.1136/bmjopen-2018-021605  
23  
24  
25  
26  
27  
28 12. Sugg HVR, Richards DA, Frost J. (2018). Morita Therapy for depression (Morita Trial):  
29 a pilot randomised controlled trial. *BMJ Open*; 8:e021605. doi:10.1136/bmjopen  
30  
31  
32  
33  
34  
35 13 Little P, Stuart B, Francis N, et al., *Effects of internet-based training on antibiotic prescribing*  
36 *rates for acute respiratory-tract infections: a multinational, cluster, randomised, factorial,*  
37 *controlled trial*. Lancet 2013;382(9899):1175–82.  
38  
39  
40  
41  
42  
43  
44 14 Tonkin-Crine S, Anthierens S, Hood K et al., *Discrepancies between qualitative and*  
45 *quantitative evaluation of randomised controlled trial results: achieving clarity through*  
46 *mixed methods triangulation*. Implement Sci 2016;**11**.  
47  
48  
49  
50  
51  
52  
53 15 Farmer T, Robinson K, Elliott SJ et al., *Developing and implementing a triangulation protocol*  
54 *for qualitative health research*. Qualitative Health Research 2006;16:377-394.doi:  
55  
56  
57 10.1177/1049732305285708  
58  
59  
60



1  
2  
3 **Figure 1 Joint display table summarising findings from RCT and qualitative research** (Bradt J, Potvin  
4  
5 N, Kesslick A et al. Supportive Care in Cancer 2015,[10] reproduced with permission)  
6  
7  
8  
9  
10  
11  
12  
13  
14  
15  
16  
17  
18  
19  
20  
21  
22  
23  
24  
25  
26  
27  
28  
29  
30  
31  
32  
33  
34  
35  
36  
37  
38  
39  
40  
41  
42  
43  
44  
45  
46  
47  
48  
49  
50  
51  
52  
53  
54  
55  
56  
57  
58  
59  
60

For peer review only

Table 4 Joint display of patient experiences per treatment benefits

| Treatment benefits | Change in music therapy <sup>a</sup> | Change in music medicine <sup>a</sup> | Patient experiences                                                                                                                                                                                                                                           |
|--------------------|--------------------------------------|---------------------------------------|---------------------------------------------------------------------------------------------------------------------------------------------------------------------------------------------------------------------------------------------------------------|
| ↑MT, ↓ MM          | 0.65 to 1.88                         | -0.11 to 0.38                         | <ul style="list-style-type: none"> <li>• Emphasize the importance of therapeutic relationship and support by therapist</li> <li>• Enjoy the creative aspect of music making</li> <li>• Are hopeful for the future</li> </ul>                                  |
| ↑MM, ↓ MT          | -0.46 to 0.59                        | 0.33 to 1.63                          | <ul style="list-style-type: none"> <li>• Apprehensive about active music making</li> <li>• Prefer familiarity of pre-recorded music</li> <li>• Hesitant about exploring feelings related to cancer</li> </ul>                                                 |
| ↑MT, ↑ MM          | 0.61 to 1.07                         | 0.73 to 1.37                          | <ul style="list-style-type: none"> <li>• Strong conviction about the power of music to support and give hope</li> <li>• Use music for mental escape</li> <li>• Use music for emotional exploration and value processing of emotions with therapist</li> </ul> |
| ↓ MT, ↓ MM         | -0.67 to -1.03                       | -0.52 to -1.06                        | <ul style="list-style-type: none"> <li>• Hold little hope for the future</li> <li>• Music evokes sad and traumatic memories</li> <li>• Feel inadequate regarding music making and singing</li> <li>• Prefer aesthetics of original recordings</li> </ul>      |

↑ great improvement, ↓ less improvement or worsening

<sup>a</sup>Range of overall z-scores (average of z-scores for mood, anxiety, relaxation, and pain)

206x96mm (96 x 96 DPI)

# BMJ Open

## Integrating quantitative and qualitative data and findings when undertaking randomised controlled trials

|                                 |                                                                                                                                                                                                                                                                                                                                                                                                                                                                                                                                                                                                                                                                                                                                                                                                                                                                                                                                                                                                                                                                                                                                                                                                                                                                                                                                                                                                                                                                                                                                                                                                                                                                                                                                                                                                                                                                                                                                                                                                                                                             |
|---------------------------------|-------------------------------------------------------------------------------------------------------------------------------------------------------------------------------------------------------------------------------------------------------------------------------------------------------------------------------------------------------------------------------------------------------------------------------------------------------------------------------------------------------------------------------------------------------------------------------------------------------------------------------------------------------------------------------------------------------------------------------------------------------------------------------------------------------------------------------------------------------------------------------------------------------------------------------------------------------------------------------------------------------------------------------------------------------------------------------------------------------------------------------------------------------------------------------------------------------------------------------------------------------------------------------------------------------------------------------------------------------------------------------------------------------------------------------------------------------------------------------------------------------------------------------------------------------------------------------------------------------------------------------------------------------------------------------------------------------------------------------------------------------------------------------------------------------------------------------------------------------------------------------------------------------------------------------------------------------------------------------------------------------------------------------------------------------------|
| Journal:                        | <i>BMJ Open</i>                                                                                                                                                                                                                                                                                                                                                                                                                                                                                                                                                                                                                                                                                                                                                                                                                                                                                                                                                                                                                                                                                                                                                                                                                                                                                                                                                                                                                                                                                                                                                                                                                                                                                                                                                                                                                                                                                                                                                                                                                                             |
| Manuscript ID                   | bmjopen-2019-032081.R2                                                                                                                                                                                                                                                                                                                                                                                                                                                                                                                                                                                                                                                                                                                                                                                                                                                                                                                                                                                                                                                                                                                                                                                                                                                                                                                                                                                                                                                                                                                                                                                                                                                                                                                                                                                                                                                                                                                                                                                                                                      |
| Article Type:                   | Communication                                                                                                                                                                                                                                                                                                                                                                                                                                                                                                                                                                                                                                                                                                                                                                                                                                                                                                                                                                                                                                                                                                                                                                                                                                                                                                                                                                                                                                                                                                                                                                                                                                                                                                                                                                                                                                                                                                                                                                                                                                               |
| Date Submitted by the Author:   | 31-Oct-2019                                                                                                                                                                                                                                                                                                                                                                                                                                                                                                                                                                                                                                                                                                                                                                                                                                                                                                                                                                                                                                                                                                                                                                                                                                                                                                                                                                                                                                                                                                                                                                                                                                                                                                                                                                                                                                                                                                                                                                                                                                                 |
| Complete List of Authors:       | <p>Richards, David; University of Exeter, College of Medicine and Health<br/>           Bazeley, Patricia; Western Sydney University, Transitional Research and Social Innovation Group<br/>           Borglin, Gunilla; Malmo University, Department of Care Science;<br/>           Lovisenberg Diaconal University College, Department of Nursing Education<br/>           Craig , Peter ; University of Glasgow, MRC/CSO Social and Public Health Sciences Unit<br/>           Emsley, Richard; King's College London, Department of Biostatistics and Health Informatics, Institute of Psychiatry, Psychology and Neuroscience<br/>           Frost, Julia; University of Exeter, College of Medicine and Health<br/>           Hill, Jacqueline; University of Exeter, College of Medicine and Health<br/>           Horwood, Jeremy; University of Bristol, Population Health Sciences<br/>           Hutchings, Hayley; Swansea University, Medical School<br/>           Jinks, Clare; Keele University, School of Primary, Community and Social Care<br/>           Montgomery, Alan; University of Nottingham, Nottingham Clinical Trials Unit<br/>           Moore, Graham; Cardiff University, School of Social Sciences<br/>           Plano Clark, Vicki; University of Cincinnati College of Education Criminal Justice and Human Services, School of Education<br/>           Tonkin-Crine, Sarah ; University of Oxford, Department of Primary Care Health Sciences, and NIHR Health Protection Research Unit in Healthcare Associated Infections and Antimicrobial Resistance<br/>           Wade, Julia; University of Bristol, Population Health Sciences<br/>           Warren, Fiona; University of Exeter, College of Medicine and Health<br/>           Wyke, Sally; University of Glasgow, Institute of Health and Wellbeing<br/>           Young, Bridget; University of Liverpool, Institute of Population Health Sciences<br/>           O'Cathain, Alicia; University of Sheffield, School of Health and Related Research</p> |
| <b>Primary Subject Heading</b>: | Research methods                                                                                                                                                                                                                                                                                                                                                                                                                                                                                                                                                                                                                                                                                                                                                                                                                                                                                                                                                                                                                                                                                                                                                                                                                                                                                                                                                                                                                                                                                                                                                                                                                                                                                                                                                                                                                                                                                                                                                                                                                                            |
| Secondary Subject Heading:      | Health services research, Evidence based practice, Patient-centred medicine, Qualitative research                                                                                                                                                                                                                                                                                                                                                                                                                                                                                                                                                                                                                                                                                                                                                                                                                                                                                                                                                                                                                                                                                                                                                                                                                                                                                                                                                                                                                                                                                                                                                                                                                                                                                                                                                                                                                                                                                                                                                           |
| Keywords:                       | QUALITATIVE RESEARCH, STATISTICS & RESEARCH METHODS, Quality in health care < HEALTH SERVICES ADMINISTRATION & MANAGEMENT                                                                                                                                                                                                                                                                                                                                                                                                                                                                                                                                                                                                                                                                                                                                                                                                                                                                                                                                                                                                                                                                                                                                                                                                                                                                                                                                                                                                                                                                                                                                                                                                                                                                                                                                                                                                                                                                                                                                   |

1  
2  
3  
4  
5  
6  
7  
8  
9  
10  
11  
12  
13  
14  
15  
16  
17  
18  
19  
20  
21  
22  
23  
24  
25  
26  
27  
28  
29  
30  
31  
32  
33  
34  
35  
36  
37  
38  
39  
40  
41  
42  
43  
44  
45  
46  
47  
48  
49  
50  
51  
52  
53  
54  
55  
56  
57  
58  
59  
60

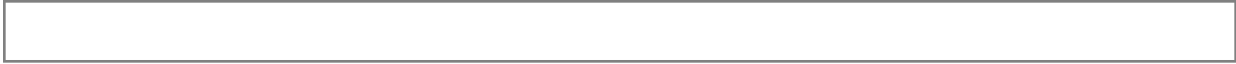

SCHOLARONE™  
Manuscripts

## Integrating quantitative and qualitative data and findings when undertaking randomised

### controlled trials

\*David A Richards, Institute for Health Research, College of Medicine and Health, University of Exeter, Exeter, UK. [d.a.richards@exeter.ac.uk](mailto:d.a.richards@exeter.ac.uk); 01392 724615

Patricia Bazeley, Transitional Research and Social Innovation Group, Western Sydney University, Sydney, Australia.

Gunilla Borglin, Department of Care Science, Malmo University, Sweden.

Department of Nursing Education, Lovisenberg Diaconal University College, Oslo, Norway

Peter Craig, MRC/CSO Social and Public Health Sciences Unit, University of Glasgow, UK.

Richard Emsley, Department of Biostatistics and Health Informatics, Institute of Psychiatry, Psychology and Neuroscience, King's College London, London, UK.

Julia Frost, Institute for Health Research, College of Medicine and Health, University of Exeter, Exeter, UK.

Jacqueline J. Hill, Institute for Health Research, College of Medicine and Health, University of Exeter, Exeter, UK.

Jeremy Horwood, Population Health Sciences, University of Bristol, Bristol, UK.

Hayley Hutchings, Medical School, Swansea University, Swansea, UK.

Clare Jinks, School of Primary, Community and Social Care, Keele University, Staffordshire, UK.

Alan Montgomery, Nottingham Clinical Trials Unit, University of Nottingham, Nottingham, UK.

Graham Moore, School of Social Sciences, Cardiff University, Cardiff, UK.

Vicki Plano Clark, School of Education, University of Cincinnati College of Education Criminal Justice and Human Services, Cincinnati, US.

Sarah Tonkin-Crine, Department of Primary Care Health Sciences, and NIHR Health Protection Research Unit in Healthcare Associated Infections and Antimicrobial Resistance, University of Oxford, Oxford, UK.

Julia Wade, Population Health Sciences, University of Bristol, Bristol, UK.

Fiona Warren, Institute for Health Research, College of Medicine and Health, University of Exeter, Exeter, UK.

Sally Wyke, Institute of Health and Wellbeing, University of Glasgow, Glasgow, UK.

Bridget Young, Institute of Population Health Sciences, University of Liverpool, Liverpool, UK.

1  
2  
3 Alicia O'Cathain, Medical Care Research Unit, ScHARR, University of Sheffield, Sheffield, UK.  
4  
5  
6

7 \* Corresponding author  
8  
9

10  
11 Keywords: research methods; integration; qualitative; trials; quantitative  
12  
13

14 Word count: 2851  
15  
16  
17  
18  
19  
20  
21  
22  
23  
24  
25  
26  
27  
28  
29  
30  
31  
32  
33  
34  
35  
36  
37  
38  
39  
40  
41  
42  
43  
44  
45  
46  
47  
48  
49  
50  
51  
52  
53  
54  
55  
56  
57  
58  
59  
60

For peer review only

**ABSTRACT**

It is common to undertake qualitative research alongside randomised controlled trials (RCTs) when evaluating complex interventions. Researchers tend to analyse these datasets one by one and then consider their findings separately within the discussion section of the final report, rarely integrating quantitative and qualitative data or findings, and missing opportunities to combine data in order to add rigour, enabling thorough and more complete analysis, provide credibility to results, and generate further important insights about the intervention under evaluation.

This paper reports on a two day expert meeting funded by the United Kingdom Medical Research Council Hubs for Trials Methodology Research with the aims to identify current strengths and weaknesses in the integration of quantitative and qualitative methods in clinical trials, establish the next steps required to provide the trials community with guidance on the integration of mixed methods in RCTs and set-up a network of individuals, groups and organisations willing to collaborate on related methodological activity.

We summarise integration techniques and go beyond previous publications by highlighting the potential value of integration using three examples that are specific to RCTs. We suggest that applying mixed methods integration techniques to data or findings from studies involving both RCTs and qualitative research can yield insights that might be useful for understanding variation in outcomes, the mechanism by which interventions have an impact, and identifying ways of tailoring therapy to patient preference and type. Given a general lack of examples and knowledge of these techniques, researchers and funders will need future guidance on how to undertake and appraise them.

**BACKGROUND**

1  
2  
3 It is common to undertake qualitative research alongside randomised controlled trials (RCTs) when  
4 evaluating complex interventions.[1,2] Qualitative research can be used to explore the feasibility,  
5 acceptability and implementation of an intervention to help understand how it was effective or why  
6 it was not effective within the RCT, or to explore the conduct of the RCT to help improve recruitment  
7 or retention rates.[2] Qualitative research can be undertaken as part of a mixed methods process  
8 evaluation,[3] as a qualitative process evaluation, or as an embedded qualitative study alongside a  
9 fully powered or pilot RCT.[4] In studies like this, researchers have a number of datasets to analyse:  
10 outcome data from the RCT, quantitative process data, and qualitative process data. Researchers  
11 tend to analyse these datasets separately and then consider their findings separately within the  
12 discussion section of the final report to funders. Researchers rarely integrate quantitative and  
13 qualitative data or findings,[1] or use formal analytical techniques recommended within wider mixed  
14 methods research. This may be because researchers are not aware of existing integration techniques  
15 or do not see the value of these techniques to the context of RCTs. Unfortunately, they may be  
16 missing opportunities to fully utilise data that has taken years to collect at great cost that could  
17 generate further important insights about the intervention under evaluation.  
18  
19  
20  
21  
22  
23  
24  
25  
26  
27  
28  
29  
30  
31  
32  
33  
34  
35  
36  
37  
38

### 39 AIMS

40  
41 In 2017, 20 researchers who generate evidence on the effectiveness of health interventions in health  
42 care and public health, and/or who have written methodological articles on integration in mixed  
43 methods research, came together in a two day meeting funded by the United Kingdom Medical  
44 Research Council Hubs for Trials Methodology Research. The aims of the meeting were to: i) identify  
45 current strengths and weaknesses in the integration of quantitative and qualitative methods in  
46 clinical trials; ii) establish the next steps required to provide the trials community with guidance on  
47 the integration of mixed methods in RCTs; iii) set-up a network of individuals, groups and  
48 organisations willing to collaborate on related methodological activity.  
49  
50  
51  
52  
53  
54  
55  
56  
57  
58  
59  
60



1  
2  
3 The meeting was structured in the form of a summit (day 1) and expert panel (day 2) with pre-  
4  
5 circulated agenda topics. The summit was focussed on current strengths and weaknesses in the  
6  
7 integration of quantitative and qualitative trial data including presentations from leading experts on  
8  
9 integration and clinical trials, mixed methods analyses, mixed methods study designs, and writing  
10  
11 mixed methods grant applications and study reports. Each topic was followed by facilitated small  
12  
13 group discussions with focussed questions for each group. These outputs were summarised and  
14  
15 presented to the whole group on day two where the expert panel considered the need for guidance  
16  
17 on the analytic integration of quantitative and qualitative trial data and the next steps required to  
18  
19 produce it. Delegates also discussed the writing of a position paper, publication plans and future  
20  
21 collaboration networks.  
22  
23  
24  
25  
26  
27

28 In this paper, the attendees at that meeting summarise relevant integration techniques, describe the  
29  
30 key conclusions drawn, and propose the potential value of integration using three examples of  
31  
32 integration suggested by the expert panel in the context of both pilot and fully powered RCTs. The  
33  
34 focus is on RCTs of health interventions but the paper is likely to be relevant to RCTs in other fields  
35  
36 such as education and social care.  
37  
38  
39  
40

#### 41 **Summary of integration techniques**

42  
43 The term integration is used to describe an intentional process whereby researchers use quantitative  
44  
45 and qualitative data or findings interdependently to address a common goal. Mixed methods  
46  
47 researchers have described a range of integration techniques. [5-9] One key integration technique is  
48  
49 joint displays that involve the production of a figure, table or graph to juxtapose and compare  
50  
51 quantitative and qualitative data or findings. Other techniques can compare the qualitative  
52  
53 responses of participants based on their measured response to the trial, or create a consolidated  
54  
55 database drawing on both quantitative and (transformed) qualitative data for further statistical  
56  
57 analysis.  
58  
59  
60

### **Meeting conclusions: the need for examples and guidance**

Having listened to discussions about integration in mixed methods research, and considered its role in the context of RCTs, attendees concluded that integration rarely occurs in practice, that there is much to be learnt from integration techniques from wider mixed methods research, and that an important step is to communicate the potential value of integration to the research community through relevant examples. Once researchers see evidence of value, in terms of this practice generating credible new and useful insights, formal guidance could be developed to ensure the quality of this endeavour. Such guidance could include systematic reviews of the utility of different methods used for mixed methods data integration with decision aids to help researchers make decisions about the most appropriate approach to adopt in different circumstances, how to ensure that the potential for data integration is factored into trial design at the earliest possible stages, the meaning of credibility for integrative practices, and how reviewers, funding boards, and readers can make judgments about the credibility of integration. Attendees agreed that in common with other clinical guidance documents, concrete examples of where these techniques have been used are required as part of the guideline. However, attendees struggled to identify many published examples of integration undertaken in the context of RCTs.

### **Examples of the potential value of integration in the context of RCTs**

Three examples were nonetheless identified and suggested by participants, and are described below. These examples integrate data or findings in the context of pilot or fully powered RCTs, and use various approaches to data integration and synthesis, guided by quantitative and/or qualitative data.

#### **Example 1: Integrating findings from a pilot RCT and embedded qualitative interview study to develop insights about treatment responses**

1  
2  
3 Thirty-one cancer patients took part in a cross-over pilot RCT of music medicine compared with  
4 music therapy.[10] Music medicine consisted of two sessions of listening to pre-recorded music;  
5  
6 music therapy involved two sessions of interactive music-making with a music therapist. Before and  
7  
8 after each session participants rated their mood, anxiety, relaxation and pain; 30 participants also  
9  
10 completed a qualitative interview at the end of treatment. The quantitative pre-post change in  
11  
12 outcomes and qualitative interview data of experiences were analysed separately. Findings were  
13  
14 then integrated to explore why some individual patients appeared to benefit more from one  
15  
16 intervention than the other. As a pilot RCT the study did not have sufficient statistical power to  
17  
18 detect clinically meaningful differences in the effectiveness of these treatments, should such  
19  
20 differences exist, but the study quantitative findings were that participants' mood, anxiety,  
21  
22 relaxation and pain appeared to improve following either music medicine or music therapy. The  
23  
24 findings from the qualitative interviews were that patients experienced music medicine and music  
25  
26 therapy as relaxing and fun. Participants escaped from stress in general and worries related to  
27  
28 cancer in particular. Music also offered hope for the future. In addition, music therapy enabled  
29  
30 patients to be creative and the presence of a therapist helped some patients to release emotion.  
31  
32 Other patients felt more comfortable with music medicine because there was no therapist and  
33  
34 because they could listen to familiar music.  
35  
36  
37  
38  
39  
40  
41  
42

43 Findings were integrated during the analysis phase of the study to explore reasons for variation in  
44  
45 outcomes. The researchers did this by creating a joint display of quantitative and qualitative findings  
46  
47 for four groups of the 30 patients with both qualitative and quantitative data: participants who  
48  
49 showed quantitative (a) improvement following music therapy (MT) but much less or no  
50  
51 improvement following music medicine (MM) (b) improvement following MM but much less or no  
52  
53 improvement following MT, (c) improvement following both interventions, and (d) deterioration  
54  
55 following both interventions. Improvement or deterioration was determined based on z-scores for  
56  
57 changes in mood, anxiety, relaxation and pain for each patient. Patient experiences, expressed in the  
58  
59  
60

1  
2  
3 qualitative interviews, were summarised in the table for each of the four groups. These experiences  
4  
5 differed by each of the four groups. Patients who described valuing the therapeutic relationship and  
6  
7 creative elements of making music in the qualitative research benefited more from MT than MM.  
8  
9  
10 Patients who were apprehensive about active music making and exploring feelings related to cancer  
11  
12 benefited more from MM than MT (see Figure 1).  
13  
14  
15

16  
17 ---insert figure 1 somewhere near here---  
18  
19  
20

21 Integration of findings from independent quantitative and qualitative analyses identified that  
22  
23 participant preferences and attitudes appeared to impact on treatment benefits. This generates the  
24  
25 hypothesis that an effective intervention could be one where cancer patients are offered a choice of  
26  
27 music therapy or music medicine based on their preferences. This hypothesis could then be tested  
28  
29 in a fully powered RCT. This approach to analysis is not without challenges. Although blinding of  
30  
31 qualitative researchers is often thought to be highly difficult because of the nature of the  
32  
33 researcher/participant conversations, with careful organisation it is possible to do initial analyses blind  
34  
35 to knowledge of the other, for example by analysing qualitative findings not knowing the trial  
36  
37 outcomes, generating key finding statements from each dataset still blind. Blinding of mixed  
38  
39 methods analysts to the quantitatively determined group allocations may be difficult but would be  
40  
41 desirable during integration to further reduce the potential for analytical bias. Despite organisational  
42  
43 difficulties, however, there is the potential for this technique to identify new insights about variation  
44  
45 in outcomes and how to develop interventions to address them.  
46  
47  
48  
49  
50  
51

52 **Example 2: Integrating data from a pilot RCT and qualitative process data to develop insights**  
53  
54 **about treatment adherence and outcomes**

55  
56 Sixty-eight adults with depression participated in a pilot RCT of Morita Therapy plus Treatment As  
57  
58 Usual (TAU) versus TAU alone.[11] Morita Therapy is a Japanese psychological therapy for common  
59  
60

1  
2  
3 mental health problems where patients are taught that unpleasant thoughts and emotions ebb and  
4  
5 flow as a matter of course, cannot be controlled by will, and can be accepted as part of the natural  
6  
7 ecology of the human experience. Twenty-eight intervention participants also attended a post-  
8  
9 treatment qualitative interview.[12] Following separate analysis of the RCT data and the qualitative  
10  
11 interviews, data from the interviews and pilot RCT were integrated at the level of individual  
12  
13 participants who had provided both types of data to explore how participants' views of the  
14  
15 intervention related to the number of sessions they attended and whether they responded to  
16  
17 treatment. Morita Therapy participants attended a mean of 8 treatment sessions out of a maximum  
18  
19 of 12; 24/34 (70.6%) adhered to a per-protocol minimum dose ( $\geq 5$  sessions). The pilot RCT was not  
20  
21 powered to detect clinically meaningful differences in treatment effectiveness; however, at follow-  
22  
23 up 22/33 intervention participants (66.7%) scored below the threshold for major depressive disorder  
24  
25 on a depression symptom checklist compared with 13.3% of controls. During the qualitative  
26  
27 interviews, many but not all of those receiving Morita Therapy found it acceptable. Acceptability was  
28  
29 related to participants' expectations and understandings of treatment (or 'orientation' towards  
30  
31 treatment) being compatible or not with the principles of Morita Therapy. Participants distinguished  
32  
33 between engaging with Morita Therapy on a conceptual level and engaging with it on a practical  
34  
35 level such as finding the required time to do it.  
36  
37  
38  
39  
40  
41  
42

43 Quantitative and qualitative data were then integrated for individual intervention participants.  
44  
45 Qualitative data were organised into typologies of views on Morita Therapy, according to the extent  
46  
47 to which participants found (1) the principles and (2) the practical processes of the therapy  
48  
49 acceptable. Quantitative data from the RCT on the numbers of sessions attended and the clinical  
50  
51 outcomes were added into a joint display. Participants who identified with Morita Therapy  
52  
53 principles typically responded to treatment regardless of the number of sessions they attended;  
54  
55 conversely, those whose orientation towards treatment was incompatible with the intervention did  
56  
57 not respond to treatment, again regardless of treatment adherence. Participants whose personal  
58  
59  
60

1  
2  
3 circumstances (such as a lack of time or support from others) impeded their opportunity to engage  
4  
5 in the intervention generally attended the fewest number of sessions but this did not drive clinical  
6  
7 outcome.  
8  
9

10  
11 By integrating qualitative and quantitative data the possibility of new relationships between  
12  
13 orientation towards treatment, adherence and clinical outcomes were found. These suggested that  
14  
15 personalising depression treatment by choosing an approach (for example, “Western” or “Eastern”  
16  
17 treatment, directive or non-directive approaches) according to the extent to which the conceptual  
18  
19 underpinnings of that treatment were compatible with a person’s own worldview, could lead to  
20  
21 better individual outcomes. It also raised the possibility that, where this congruence is present,  
22  
23 patients with demanding personal circumstances which constrain their ability to engage in  
24  
25 treatment may still benefit from a lower intensity version of the same treatment offered in fewer  
26  
27 sessions. Clearly the small numbers in this study is a limitation and the analysis was not conclusive,  
28  
29 but rather they raised interesting possibilities for testing in future RCTs of personalised medicine.  
30  
31  
32  
33  
34  
35

### 36 37 **Example 3: Integrating findings from the quantitative and qualitative parts of a process evaluation** 38 39 **to interpret the findings of a fully powered cluster RCT**

40  
41 A large, multi-country factorial cluster RCT was conducted to examine the effectiveness of  
42  
43 interventions aimed at decreasing antibiotic prescribing for acute cough by general practitioners  
44  
45 (GPs).[13] Interventions were: (i) GP communication skills training and use of a patient booklet; (ii)  
46  
47 training in the provision and use of a C-reactive protein (CRP) test device; (iii) both interventions; or  
48  
49 (iv) neither intervention. Each of the separate interventions led to decreases in antibiotic prescribing  
50  
51 and the combination of both led to the largest decrease. The mixed methods process evaluation,  
52  
53 undertaken alongside the RCT, collected quantitative and qualitative data on patients’ and GPs’  
54  
55 views on prescribing antibiotics for acute cough and their experiences of the interventions.  
56  
57  
58 Quantitative self-report data were collected from 2886 patients and 346 GPs. Qualitative data were  
59  
60

1  
2  
3 collected from interviews with 62 patients and 66 GPs. Data from the four different sources in the  
4 process evaluation were analysed separately. Findings from all four sources were then compared in  
5 an integrative analysis.[14] Based on the surveys, there was a high level of satisfaction with both  
6 interventions. GPs reported that the communication skills training, use of a patient booklet, and  
7 training with use of the CRP test helped them to reduce prescribing. Patients who received the  
8 booklet reported the highest levels of self-care enablement for their cough and awareness that  
9 taking antibiotics could be risky and harmful. Based on the qualitative interviews, GPs felt that the  
10 communication skills training gave them greater confidence in addressing patient expectations for  
11 an antibiotic and that the CRP test was helpful to decrease diagnostic uncertainty and reassure  
12 patients. The booklet and use of the CRP test were acceptable to patients and patients perceived  
13 that both the interventions supported GPs' prescribing decision.  
14  
15  
16  
17  
18  
19  
20  
21  
22  
23  
24  
25  
26  
27  
28  
29

30 The key findings from each of the four datasets in the process evaluation were integrated by  
31 summarising them in a form of joint display known as Triangulation Protocol.[15] Three analysts  
32 independently compared findings across the datasets, considering where they agreed, partly agreed,  
33 did not agree, or where there was an unexpected gap in findings from one of the datasets. Examples  
34 of the joint displays are given within the article. There was disagreement between findings from  
35 different datasets in terms of the utility of the CRP test. In the qualitative interviews with GPs, the  
36 CRP test was viewed as helping to convince patients that a no-antibiotic decision was appropriate  
37 when the patient expected an antibiotic to be prescribed. In contrast, patients reported in  
38 interviews that they were confident in the GP's prescription decision regardless of whether or not  
39 the CRP test had been undertaken, especially if they were given a detailed explanation by their GP  
40 and a booklet on self-care. Findings from the patient survey reinforced the importance of  
41 communication to patients. This highlighted the importance to patients of improved communication  
42 rather than diagnostics for antibiotic prescribing. Limitations included the non-complementary  
43 nature of the retrospectively designed interview guides and the lack of individual participant level  
44  
45  
46  
47  
48  
49  
50  
51  
52  
53  
54  
55  
56  
57  
58  
59  
60

1  
2  
3 data linking. This study also highlighted that attention needs to be paid to the quality of the  
4  
5 application of integration techniques, for example the use of three independent analysts to create  
6  
7 and interpret the joint display.  
8  
9

## 10 11 12 **CONCLUSIONS**

13  
14 Applying mixed methods integration techniques to data or findings from studies involving both RCTs  
15  
16 and qualitative research can yield insights that might be useful for understanding variation in  
17  
18 outcomes, the mechanism by which interventions have an impact, and identifying ways of tailoring  
19  
20 therapy to patient preference and type. The three examples given here are by no means definitive.  
21  
22 However, they do illustrate different approaches to data integration including synthesis of findings  
23  
24 driven by quantitative data (example 1), qualitative data (example 2), or by both equally (example  
25  
26 3). Further examples of integration using these and other analytical techniques might help to  
27  
28 persuade researchers and funders of the value of doing this. However, published examples remain  
29  
30 rare and the research community has no guidance on which of these and other techniques might  
31  
32 yield the best added value to RCTs. The development of guidance will help to ensure the quality of  
33  
34 this practice by, for example, recommending the use of independent data collection and analysis,  
35  
36 blinding of analysts undertaking integration analyses, and rationale for the choice of analysis  
37  
38 methods. Such guidance could include systematic reviews of the utility of different methods used for  
39  
40 mixed methods data integration with decision aids to help. Guidance might also equip research  
41  
42 funding boards, reviewers and other readers to judge the credibility of any integration.  
43  
44  
45  
46  
47  
48  
49

50 **Competing interests:** the authors declare that they have no competing interests.  
51  
52

53  
54 **Funding:** the United Kingdom Medical Research Council Hubs for Trials Methodology Research  
55  
56 (HTMR) Network funded the meeting. The funder had no role in the design of the meeting and in  
57  
58 writing the manuscript.  
59  
60



1  
2  
3  
4  
5 **Authors' contributions:** DAR, JJH and AoC conceived, planned and conducted the meeting. AoC, JJH  
6 and DAR drafted the original manuscript. PB, GB, PC, RE, JF, JH, HH, CJ, AM, GM, VPC, ST-C, JW, FW,  
7  
8 SW, BY attended the meeting and read, edited and approved the final manuscript.  
9

10  
11  
12  
13  
14 **Acknowledgements:** Holly Sugg provided information for example 2. DR is supported by the National  
15 Institute for Health Research (NIHR) Applied Research Collaboration (ARC) South West Peninsula. CJ  
16 is supported by the National Institute for Health Research (NIHR) Applied Research Collaboration  
17 (ARC) West Midlands. JH is supported by the National Institute for Health Research (NIHR) Applied  
18 Research Collaboration (ARC) West. STC is funded by the National Institute for Health Research  
19 Health Protection Research Unit (NIHR HPRU) in Healthcare Associated Infections and Antimicrobial  
20 Resistance at the University of Oxford in partnership with Public Health England (PHE) [HPRU-2012-  
21 10041].  
22  
23  
24  
25  
26  
27  
28  
29  
30  
31  
32  
33  
34  
35  
36  
37  
38  
39  
40  
41  
42

43  
44  
45  
46  
47  
48  
49  
50  
51  
52  
53  
54  
55  
56  
57  
58  
59  
60  
The views expressed are those of the author(s) and not necessarily those of the MRC, NHS, the NIHR,  
the Department of Health and Social Care or Public Health England.

## REFERENCES

- 1 Lewin S, Glenton C, and Oxman AD, *Use of qualitative methods alongside randomised  
2 controlled trials of complex healthcare interventions: methodological study.* BMJ  
3 2009;**339**:b3496.
- 4 O'Cathain A, Thomas KJ, Drabble SJ et al., *What can qualitative research do for randomised  
5 controlled trials? A systematic mapping review.* BMJ Open 2013;**3**(6):e002889.

- 1  
2  
3 3 Moore G, Audrey S, Barker M et al., *Process evaluation of complex interventions: Medical*  
4  
5 *Research Council guidance*. BMJ 2015;**350**.  
6  
7  
8  
9  
10 4 O’Cathain A, *A practical guide to using qualitative research with randomized controlled trials*;  
11  
12 Oxford: OUP, 2018.  
13  
14  
15  
16 5 Bazeley P, *Integrating analyses in mixed methods research*; London: Sage, 2018.  
17  
18  
19  
20  
21 6 Feters MD, Curry LA, and Creswell JW, *Achieving Integration in Mixed Methods Designs-*  
22  
23 *Principles and Practices*. Health Services Research 2013;**48**(6):2134-2156.  
24  
25  
26  
27  
28 7 Creswell JW and Plano Clark VL, *Designing and conducting mixed methods research*. 3rd ed.  
29  
30 Thousand Oaks, CA; London, UK; New Dehli, India; Singapore: SAGE, 2017.  
31  
32  
33  
34 8 O’Cathain A, Murphy E, and Nicholl J, *Three techniques for integrating data in mixed*  
35  
36 *methods studies*. BMJ 2010;**341**.  
37  
38  
39  
40  
41 9 Guetterman TC, Feters MD, and Creswell JW, *Integrating Quantitative and Qualitative*  
42  
43 *Results in Health Science Mixed Methods Research Through Joint Displays*. Ann Fam Med  
44  
45 2015;**13**(6):554-561.  
46  
47  
48  
49  
50 10 Bradt J, Potvin N, Kesslick A et al., *The impact of music therapy versus music medicine on*  
51  
52 *psychological outcomes and pain in cancer patients: a mixed methods study*. Support Care  
53  
54 Cancer 2015;**23**(5):1261-1271.  
55  
56  
57  
58  
59  
60

- 1  
2  
3 11. Sugg HVR, Richards DA and Frost J, *Morita Therapy for depression (Morita Trial): a pilot*  
4 *randomised controlled trial*. *BMJ Open* 2018;8:e021605.doi:10.1136/bmjopen-2018-021605  
5  
6  
7  
8  
9  
10 12. Sugg HVR, Frost J, Richards DA. (2019). Morita Therapy for depression (Morita Trial): an  
11 embedded qualitative study of acceptability. *BMJ Open*, 9, e023873.  
12  
13  
14  
15  
16  
17  
18  
19 13. Little P, Stuart B, Francis N, et al., *Effects of internet-based training on antibiotic prescribing*  
20 *rates for acute respiratory-tract infections: a multinational, cluster, randomised, factorial,*  
21 *controlled trial*. *Lancet* 2013;382(9899):1175–82.  
22  
23  
24  
25  
26  
27  
28 14. Tonkin-Crine S, Anthierens S, Hood K et al., *Discrepancies between qualitative and*  
29 *quantitative evaluation of randomised controlled trial results: achieving clarity through*  
30 *mixed methods triangulation*. *Implement Sci* 2016;**11**.  
31  
32  
33  
34  
35  
36  
37 15. Farmer T, Robinson K, Elliott SJ et al., *Developing and implementing a triangulation protocol*  
38 *for qualitative health research*. *Qualitative Health Research* 2006;16:377-394.doi:  
39 10.1177/1049732305285708  
40  
41  
42  
43  
44  
45

46 **Figure 1 Joint display table summarising findings from RCT and qualitative research** (Bradt J, Potvin  
47  
48 N, Kesslick A et al. Supportive Care in Cancer 2015,[10] reproduced with permission)  
49  
50  
51  
52  
53  
54  
55  
56  
57  
58  
59  
60

Table 4 Joint display of patient experiences per treatment benefits

| Treatment benefits | Change in music therapy <sup>a</sup> | Change in music medicine <sup>a</sup> | Patient experiences                                                                                                                                                                                                                                           |
|--------------------|--------------------------------------|---------------------------------------|---------------------------------------------------------------------------------------------------------------------------------------------------------------------------------------------------------------------------------------------------------------|
| ↑MT, ↓MM           | 0.65 to 1.88                         | -0.11 to 0.38                         | <ul style="list-style-type: none"> <li>• Emphasize the importance of therapeutic relationship and support by therapist</li> <li>• Enjoy the creative aspect of music making</li> <li>• Are hopeful for the future</li> </ul>                                  |
| ↑MM, ↓MT           | -0.46 to 0.59                        | 0.33 to 1.63                          | <ul style="list-style-type: none"> <li>• Apprehensive about active music making</li> <li>• Prefer familiarity of pre-recorded music</li> <li>• Hesitant about exploring feelings related to cancer</li> </ul>                                                 |
| ↑MT, ↑MM           | 0.61 to 1.07                         | 0.73 to 1.37                          | <ul style="list-style-type: none"> <li>• Strong conviction about the power of music to support and give hope</li> <li>• Use music for mental escape</li> <li>• Use music for emotional exploration and value processing of emotions with therapist</li> </ul> |
| ↓MT, ↓MM           | -0.67 to -1.03                       | -0.52 to -1.06                        | <ul style="list-style-type: none"> <li>• Hold little hope for the future</li> <li>• Music evokes sad and traumatic memories</li> <li>• Feel inadequate regarding music making and singing</li> <li>• Prefer aesthetics of original recordings</li> </ul>      |

↑ great improvement, ↓ less improvement or worsening

<sup>a</sup>Range of overall z-scores (average of z-scores for mood, anxiety, relaxation, and pain)

206x96mm (96 x 96 DPI)
